# Supplementary material
Source: ML conference proceedings conference paper supplement (https://www.ecva.net/papers/eccv_2020/papers_ECCV/html/123690596_ECCV_2020_paper.php)
Supplement: Supplementary file 3 [file 123690596-supp.zip]

Archive with 8 entries (7 files):
- 123690596-supp/
- __MACOSX/._123690596-supp
- 123690596-supp/4694-supp.pdf
- __MACOSX/123690596-supp/._4694-supp.pdf
- 123690596-supp/SeqXY2SeqZ_ECCV2020.mp4
- __MACOSX/123690596-supp/._SeqXY2SeqZ_ECCV2020.mp4
- 123690596-supp/README.txt
- __MACOSX/123690596-supp/._README.txt
