# Supplementary material
Source: ML conference proceedings conference paper supplement (https://www.ecva.net/papers/eccv_2020/papers_ECCV/html/123690596_ECCV_2020_paper.php)
Supplement: Supplementary file 3 [file 123690596-supp.zip › 123690596-supp/README.txt]

MP4 codec

https://www.microsoft.com/en-us/download/details.aspx?id=507
